# Supplementary material for: Terminal uridyltransferase 7 regulates TLR4-triggered inflammation by controlling Regnase-1 mRNA uridylation and degradation
Source: PubMed Central journal article supplement (PMC8241994; doi:10.1038/s41467-021-24177-7), 2021-06-29

# Supplementary Figure 1, Related to Fig. 1

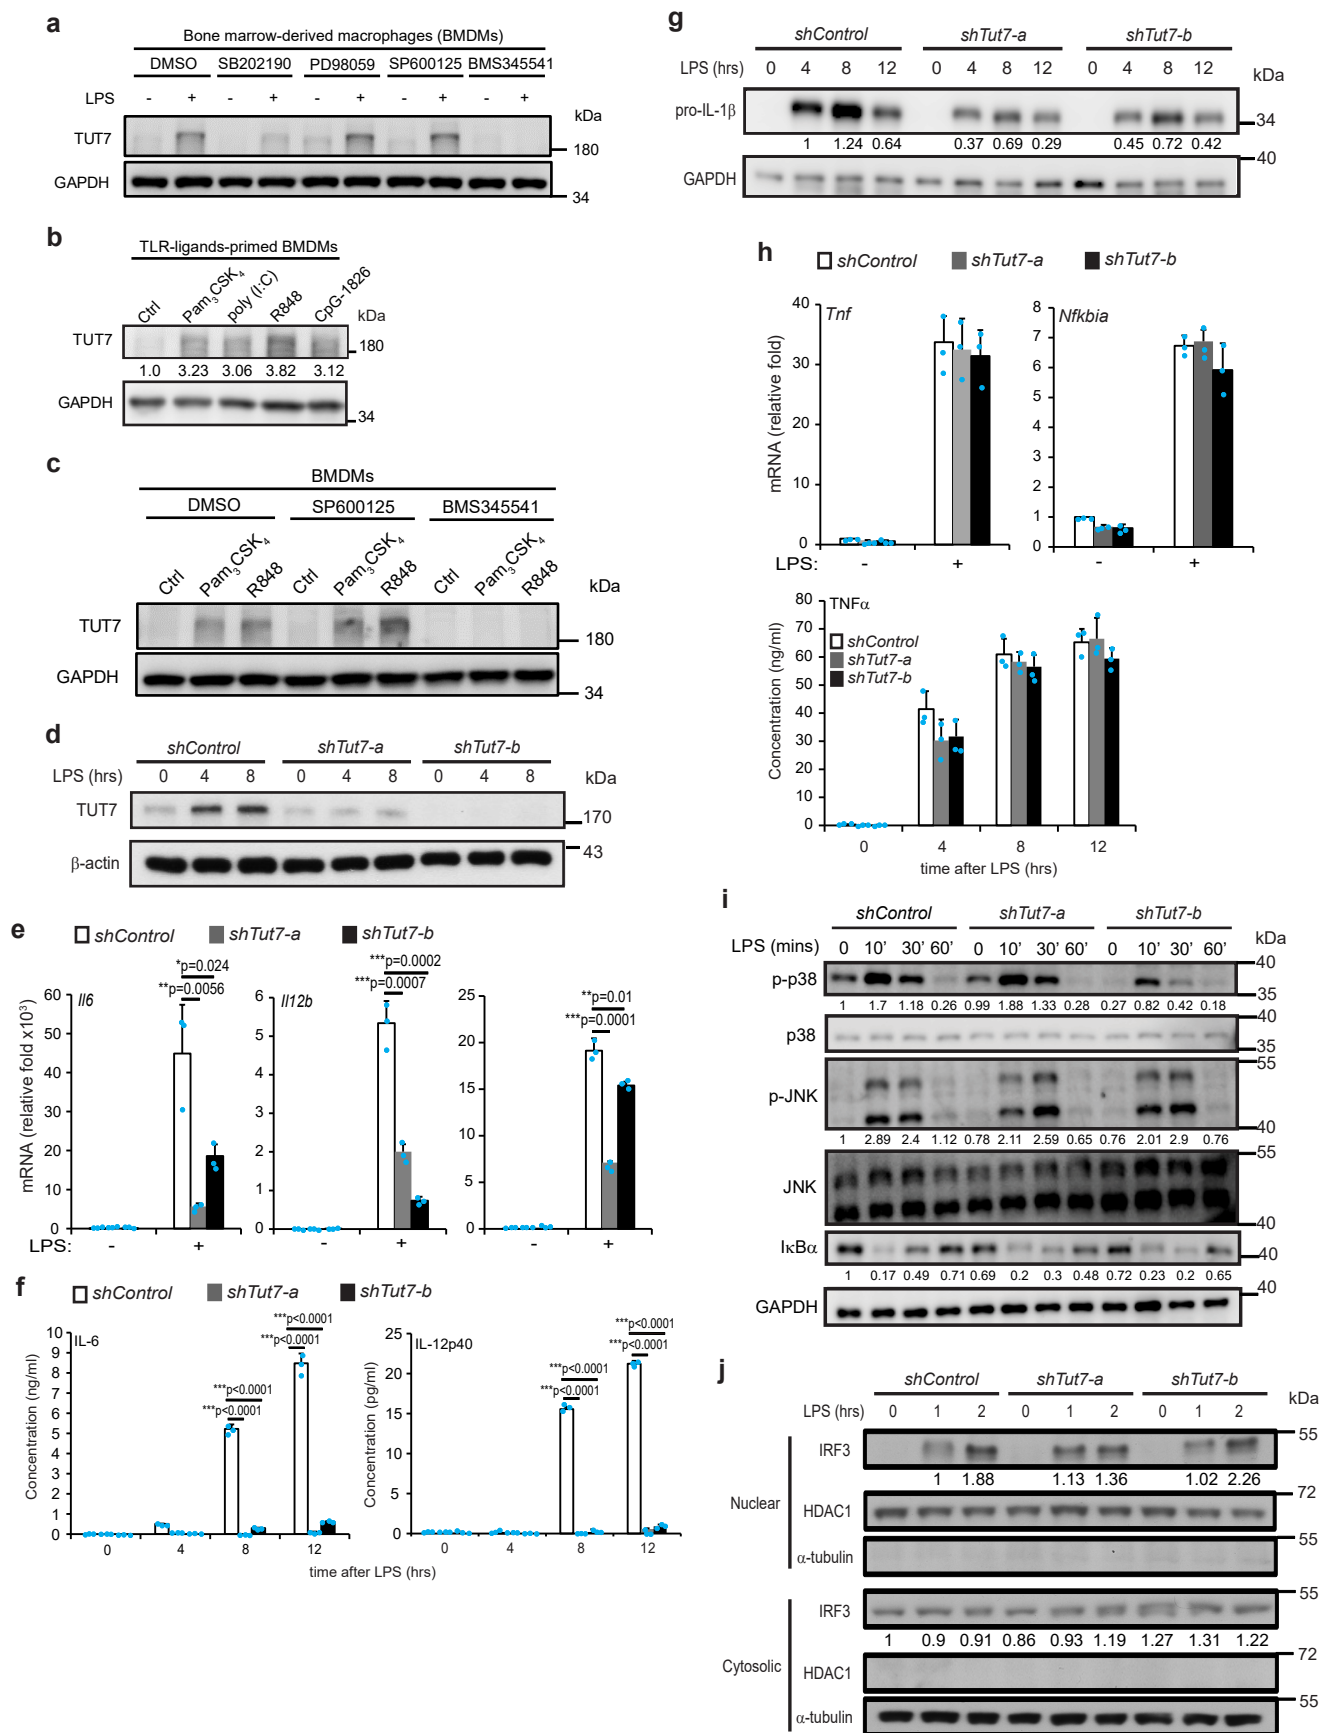

## Supplementary Figure 1. Depletion of TUT7 affects the production of LPS-induced inflammatory cytokines in RAW 264.7 macrophages.

(a) Wild-type BMDMs were pre-treated with the indicated kinase inhibitors, including SB202190 (p38 inhibitor), PD98059 (ERK inhibitor), SP600125 (JNK inhibitor), and BMS345541 (IKK inhibitor) for 30 min and then incubated with 100 ng/ml LPS for 8 hr. The expression of TUT7 was analyzed by immunoblotting. (b) Wild-type BMDMs were treated with different TLR ligands, including Pam<sub>3</sub>CSK<sub>4</sub> (TLR1/2, 1 μg/ml), poly(I:C) (TLR3, 30 μg/ml), R848 (TLR7/8, 1 μg/ml) and CpG-1826 (TLR9, 1 μM), for 8 hr. The expression of TUT7 was analyzed by immunoblotting. (c) Wild-type BMDMs were pre-treated with JNK (SP600125) and IKK (BMS345541) inhibitors followed by stimulation of Pam<sub>3</sub>CSK<sub>4</sub> (TLR1/2, 1 μg/ml) and R848 (TLR7/8, 1 μg/ml) for 8 hr. The expression of TUT7 was analyzed by immunoblotting. (d-j) RAW 264.7 macrophages were infected with lentiviruses encoding control shRNA (*shControl*) or *shTut7* before stimulation with 100 ng/ml of LPS. Total RNAs were obtained from cells 4 hr after LPS stimulation. The expression of the indicated mRNAs and TUT7 protein was measured by RT-qPCR and immunoblotting, respectively (d, e, h). Cultural media were collected at the indicated time points after LPS treatment, and the amounts of cytokines were analyzed by ELISA (f, h). The expressions of pro-IL-1β, IκBα and phosphorylated-JNK and -p38 in cell lysates were analyzed by immunoblotting (g, i). Control and *shTut7*-expressing RAW 264.7 macrophages were treated with 100 ng/ml of LPS for the indicated periods of time. The expression of IRF3 in the cytosolic and nuclear fractions were analyzed by immunoblotting. HDAC1 and α-tubulin were used as markers for the nuclear and cytosolic fractions, respectively (j). Data presented are representative of three independent experiments with triplicates in each experiment (error bars, mean ± S.D.). The *p* values were obtained from two-tailed Student's *t*-test and are shown in the figure if *p* < 0.05. Source data are provided as a Source Data file.

# Supplementary Figure 2, Related to Fig. 1

**a**

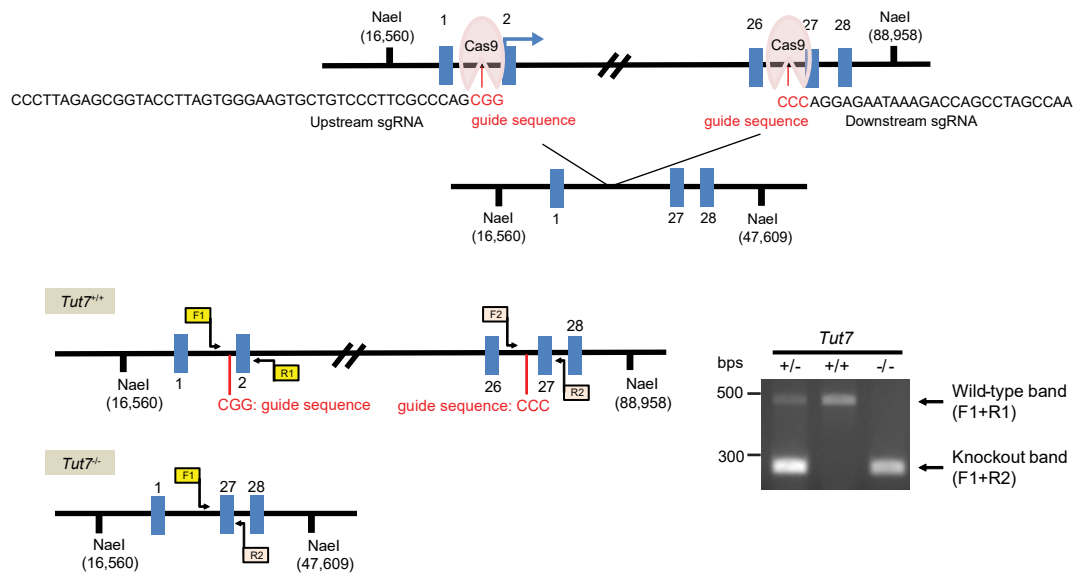

**b**

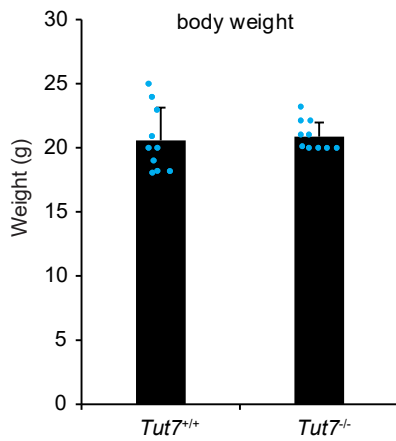

**c**

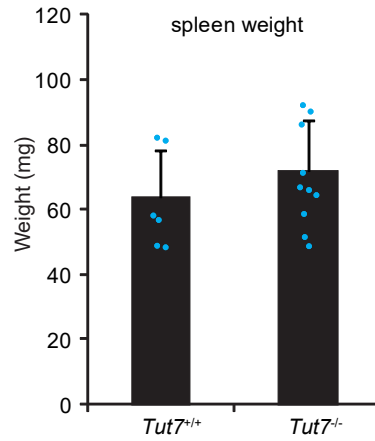

**d**

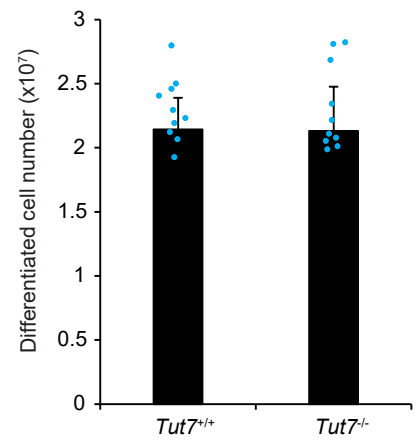

## Supplementary Figure 2. Generation of *Tut7*-deleted mice.

(a) Schematic diagram of the mouse wild-type *Tut7* allele, the two target sites on introns 1 and 26 for guide RNAs (gRNAs), and the deleted *Tut7* allele after excision by the CRISPR/Cas9 system. F1 and R1, and F2 and R2 indicate the positions of the two different primer pairs used for PCR genotyping. Genotyping of *Tut7*<sup>+/+</sup>, *Tut7*<sup>+/-</sup>, and *Tut7*<sup>-/-</sup> mice using their genomic DNA from tails are shown on the bottom right. (b, c) Seven-week old *Tut7*<sup>+/+</sup> and *Tut7*<sup>-/-</sup> mice had similar body weight (b), and spleen weight (c). (d) Depletion of TUT7 has no significant effect on *in vitro* differentiation of bone marrow cells into macrophages. Data are mean ± SD for six to ten *Tut7*<sup>+/+</sup> and *Tut7*<sup>-/-</sup> mice. Source data are provided as a Source Data file.

# Supplementary Figure 3, Related to Fig. 2

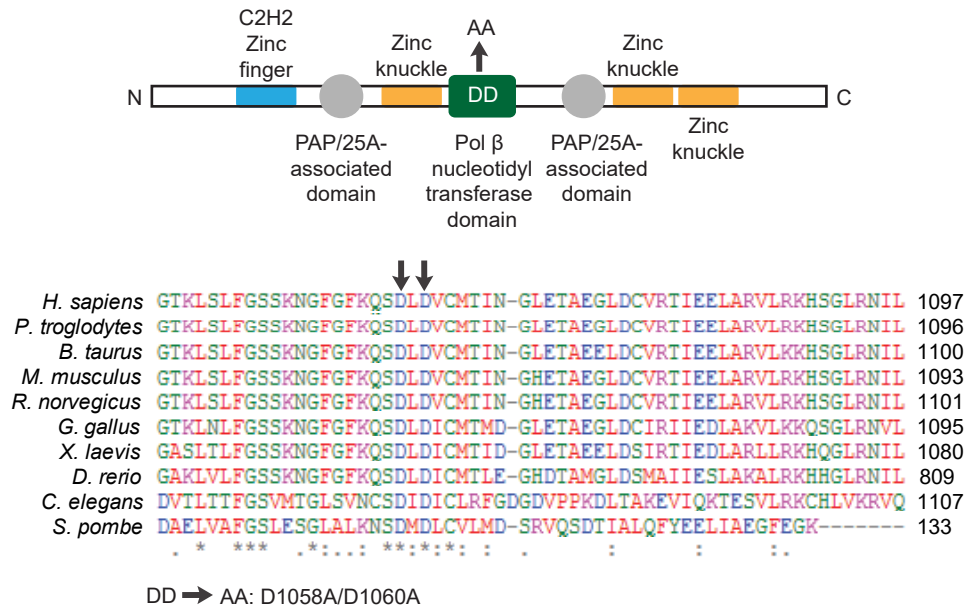

### Supplementary Figure 3. The domain organization of TUT7.

Schematic diagram of the functional domains of human TUT7 and sequence alignment of TUT7 among various species. Amino acid sequence alignments were performed using the Clustal Omega program at EMBL-EBI (<https://www.ebi.ac.uk/Tools/msa/clustalo>). An asterisk (\*) denotes an identical residue, a colon (:) denotes conserved substitutions, and a period (.) denotes semi-conserved substitutions. The arrows indicate the two aspartate residues which are critical for its catalytic activity. Source data are provided as a Source Data file.

# Supplementary Figure 4, Related to Fig. 2

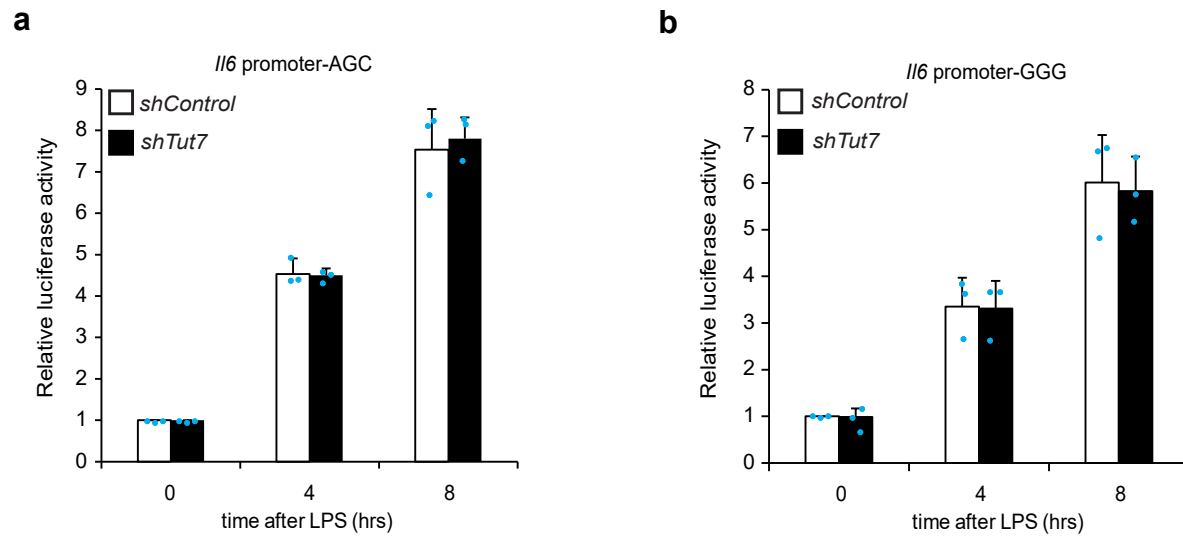

**Supplementary Figure 4. TUT7 does not affect IL-6 promoter activity after LPS stimulation.** (a, b) Control and *shTut7*-expressing RAW 264.7 macrophages were co-transfected with *firefly* luciferase reporter plasmids containing *IL6*-AGC (a) or *IL6*-GGG (b) promoter and *TK-renilla* control reporter plasmid. At 48 hr after transfection, cells were treated with LPS (100 ng/ml) for different periods of time. Cells were harvested and the luciferase activity was determined. Data presented are representative of three independent experiments performed in triplicate (error bars, mean  $\pm$  S.D.). Source data are provided as a Source Data file.



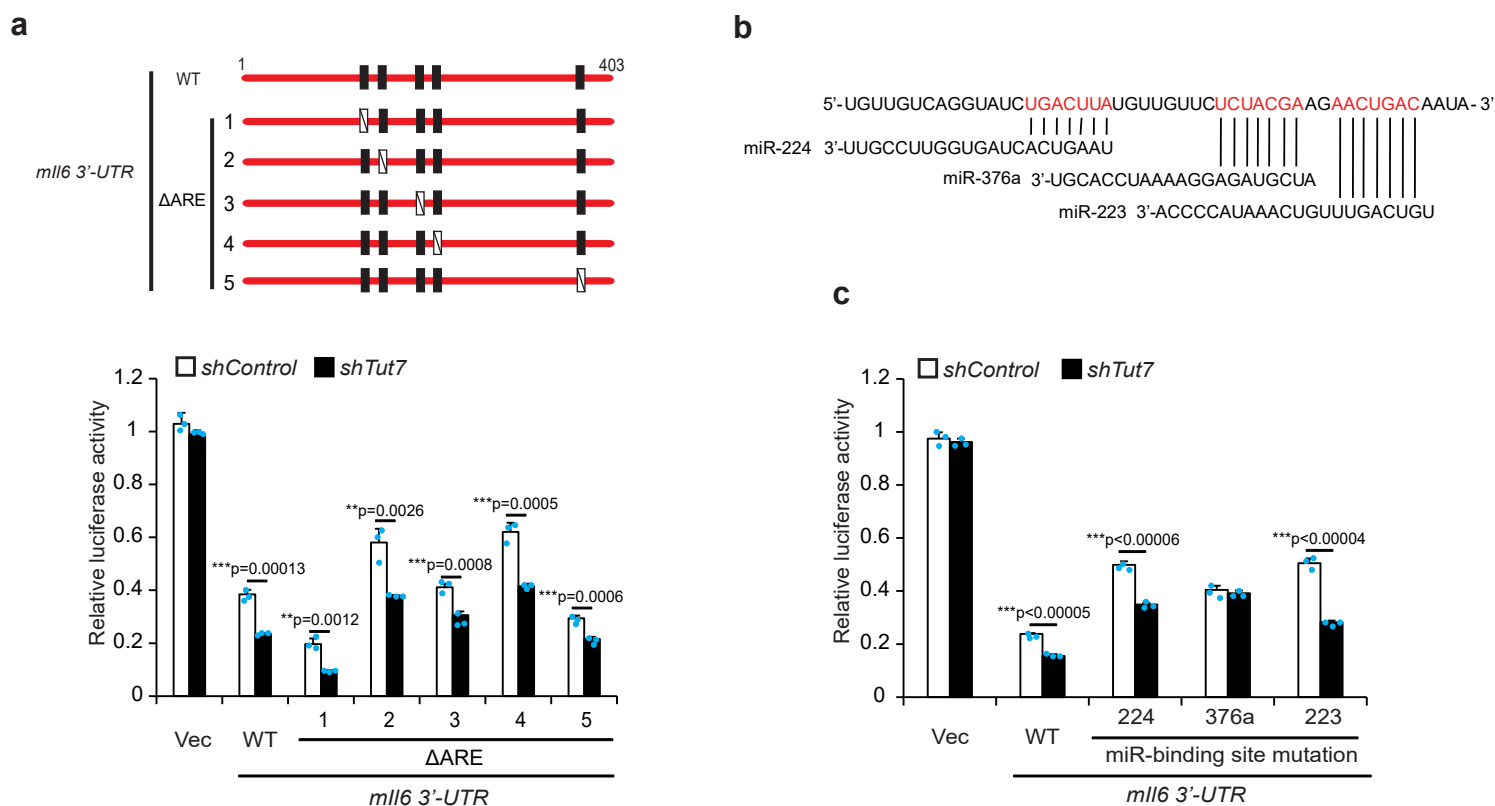

**Supplementary Figure 5. TUT7-regulated *Il6* stability does not require ARE sites on its 3'-UTR.**

(a) Top: Schematic diagram of the *firefly* luciferase reporter constructs containing full-length (WT) or AU-rich element mutation (AUUUAAGGGA) ( $\Delta$ ARE1-5 of *Il6* 3'-UTR). Bottom: Control and *shTut7*-expressing (*shTut7*) RAW 264.7 macrophages were co-transfected with *firefly* luciferase reporter constructs (WT and  $\Delta$ ARE1-5 of *Il6* 3'-UTR) and *TK-renilla* luciferase. At 48 hr after transfection, cells were treated with LPS (100 ng/ml) for 8 hr, followed by analysis of the luciferase activities as described previously. (b) Schematic diagram of predicted miRNAs and their putative binding sites on mouse *Il6* 3'-UTR. (c) Control and *shTut7*-expressing RAW 264.7 macrophages were co-transfected with *firefly* luciferase reporter plasmids containing wild-type or different *Il6* 3'-UTR mutants with deletion at individual miRNA-binding site as well as *TK-renilla* luciferase. Cells were treated with LPS (100 ng/ml) and luciferase activities were analyzed 8 hr later. Data presented are representative of three independent experiments with triplicates in each experiment (error bars, mean  $\pm$  S.D.). The *p* values were obtained from two-tailed Student's *t*-test and are shown in the figure if *p* < 0.05. Source data are provided as a Source Data file.

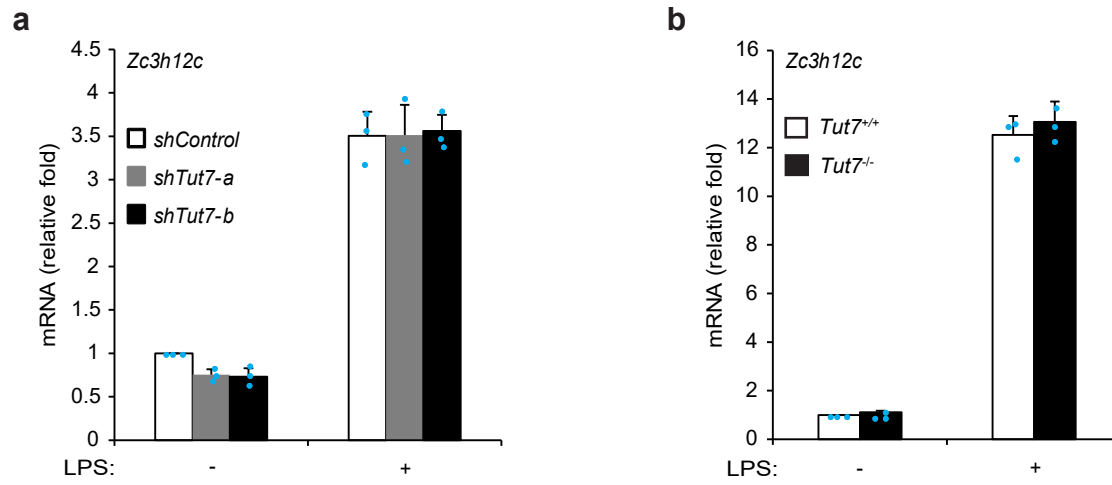

**Supplementary Figure 6. TUT7 does not regulate *Zc3h12c* expression.**  
(a, b) Control and *shTut7*-expressing RAW 264.7 macrophages (a), and wild-type and *Tut7*<sup>-/-</sup> BMDMs (b) were stimulated with 100 ng/ml of LPS for 4 hr. The expression of *Zc3h12c* mRNA was analyzed by RT-qPCR. Data presented are representative of three independent experiments performed in triplicate (error bars, mean ± S.D.). Source data are provided as a Source Data file.

## Supplementary Figure 7, Related to Fig. 4

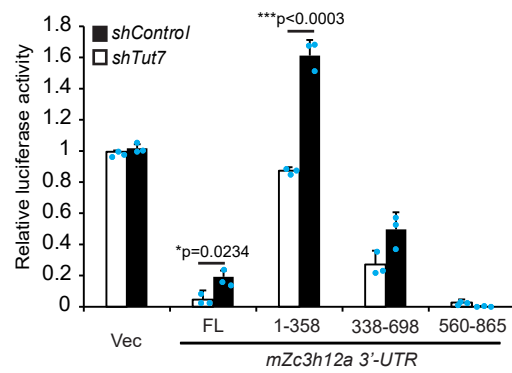

### Supplementary Figure 7. TUT7 regulates *Zc3h12a* through its 3'-UTR<sub>100-250</sub>.

Control and *shTut7*-expressing RAW 264.7 cells were co-transfected with *firefly* luciferase reporter constructs containing full-length (FL) or different truncated forms of *Zc3h12a* 3'-UTR as well as *TK-renilla* luciferase. Forty-eight hr later, transfected cells were stimulated with 100 ng/ml of LPS. Dual-luciferase activity assay was performed 8 hr after stimulation. Data presented are representative of three independent experiments with triplicates in each experiment (error bars, mean  $\pm$  S.D.). The  $p$  values were obtained from two-tailed Student's  $t$ -test and are shown in the figure if  $p < 0.05$ . Source data are provided as a Source Data file.

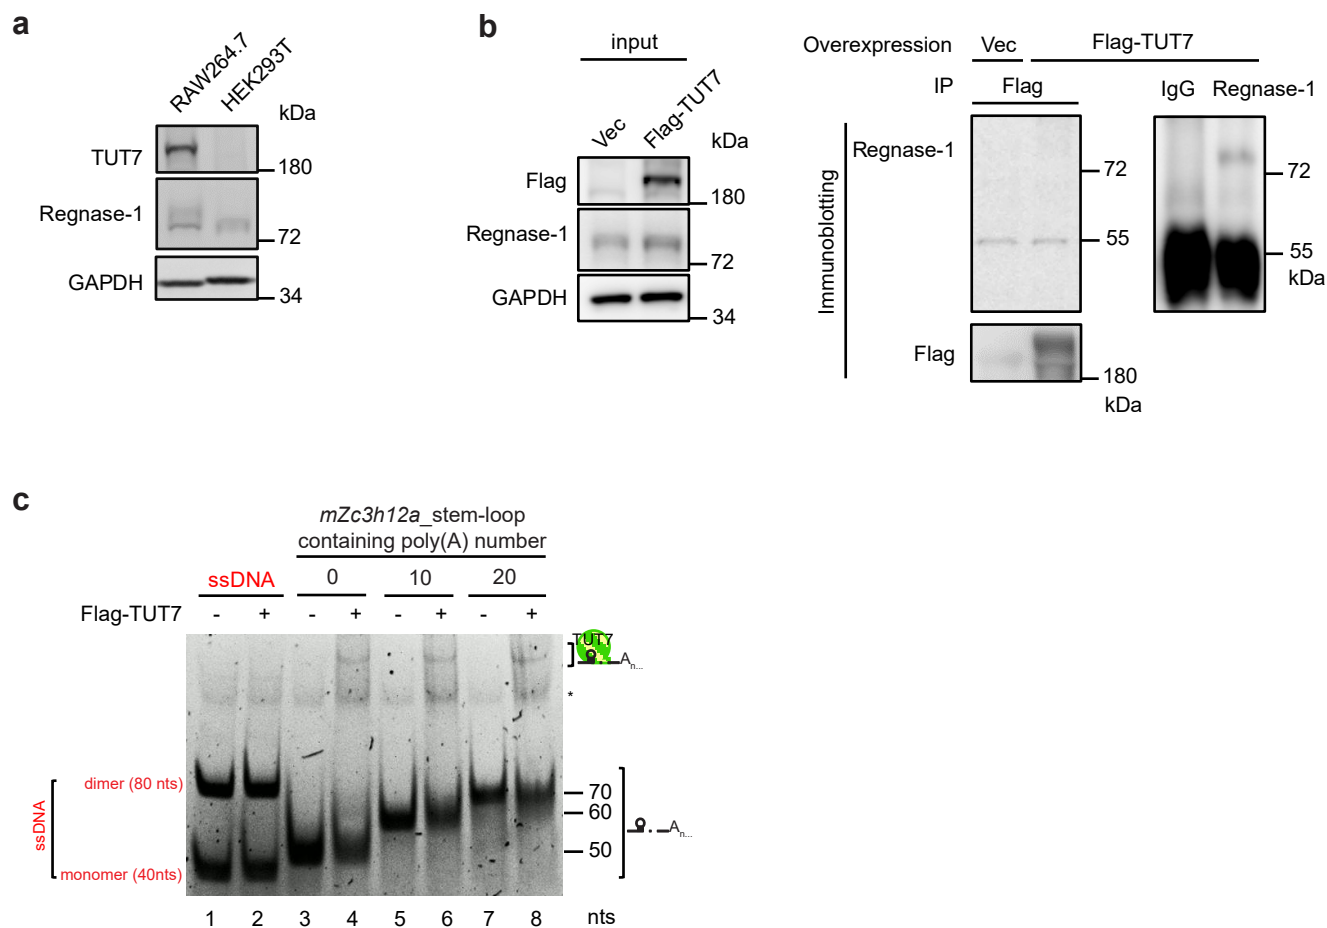

**Supplementary Figure 8. TUT7 associates with *Zc3h12a* independent on the length of its poly(A) tails.**

(a) RAW 264.7 and HEK293T cells were collected and lysed. TUT7 and Regnase-1 was analyzed by immunoblotting. (b) HEK293T cells were transfected with either vector or Flag-tagged TUT7 expression plasmid, and cell lysates were incubated with control IgG or protein A-agarose beads-conjugated anti-Flag or Regnase-1 antibody at 4°C for 4 hr. The immunocomplexes were analyzed by immunoblotting with the indicated antibodies. (c) The synthetic *Zc3h12a* RNAs containing stem-loop with various poly(A) tail lengths were incubated with immunopurified flag-tagged wild-type TUT7 at 37°C for 30 min. RNA samples were resolved on a 6% PAGE and visualized by SYBR Green II staining. Single-strand DNA (ssDNA) acts as a negatively binding control of TUT7. \* represents the non-specific binding. Source data are provided as a Source Data file.

## Supplementary Figure 9, Related to Fig. 6

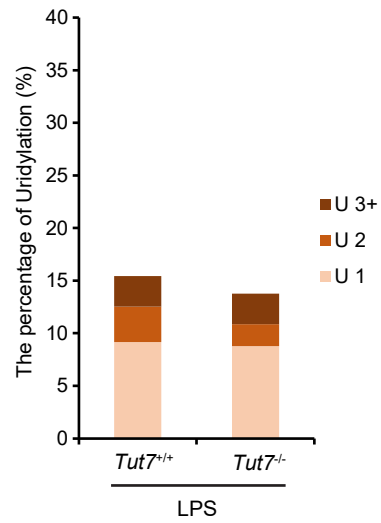

### Supplementary Figure 9. *Ilg6* transcripts were analyzed by gene specific TAIL-Seq.

The frequency of uridylation on the 3' end of *Ilg6* was obtained from the experiments described in Fig. 6a. Uridylation frequency is the percentage of uridylated *Ilg6* reads out of the total number of *Ilg6* reads. Source data are provided as a Source Data file.

# Supplementary Figure 10

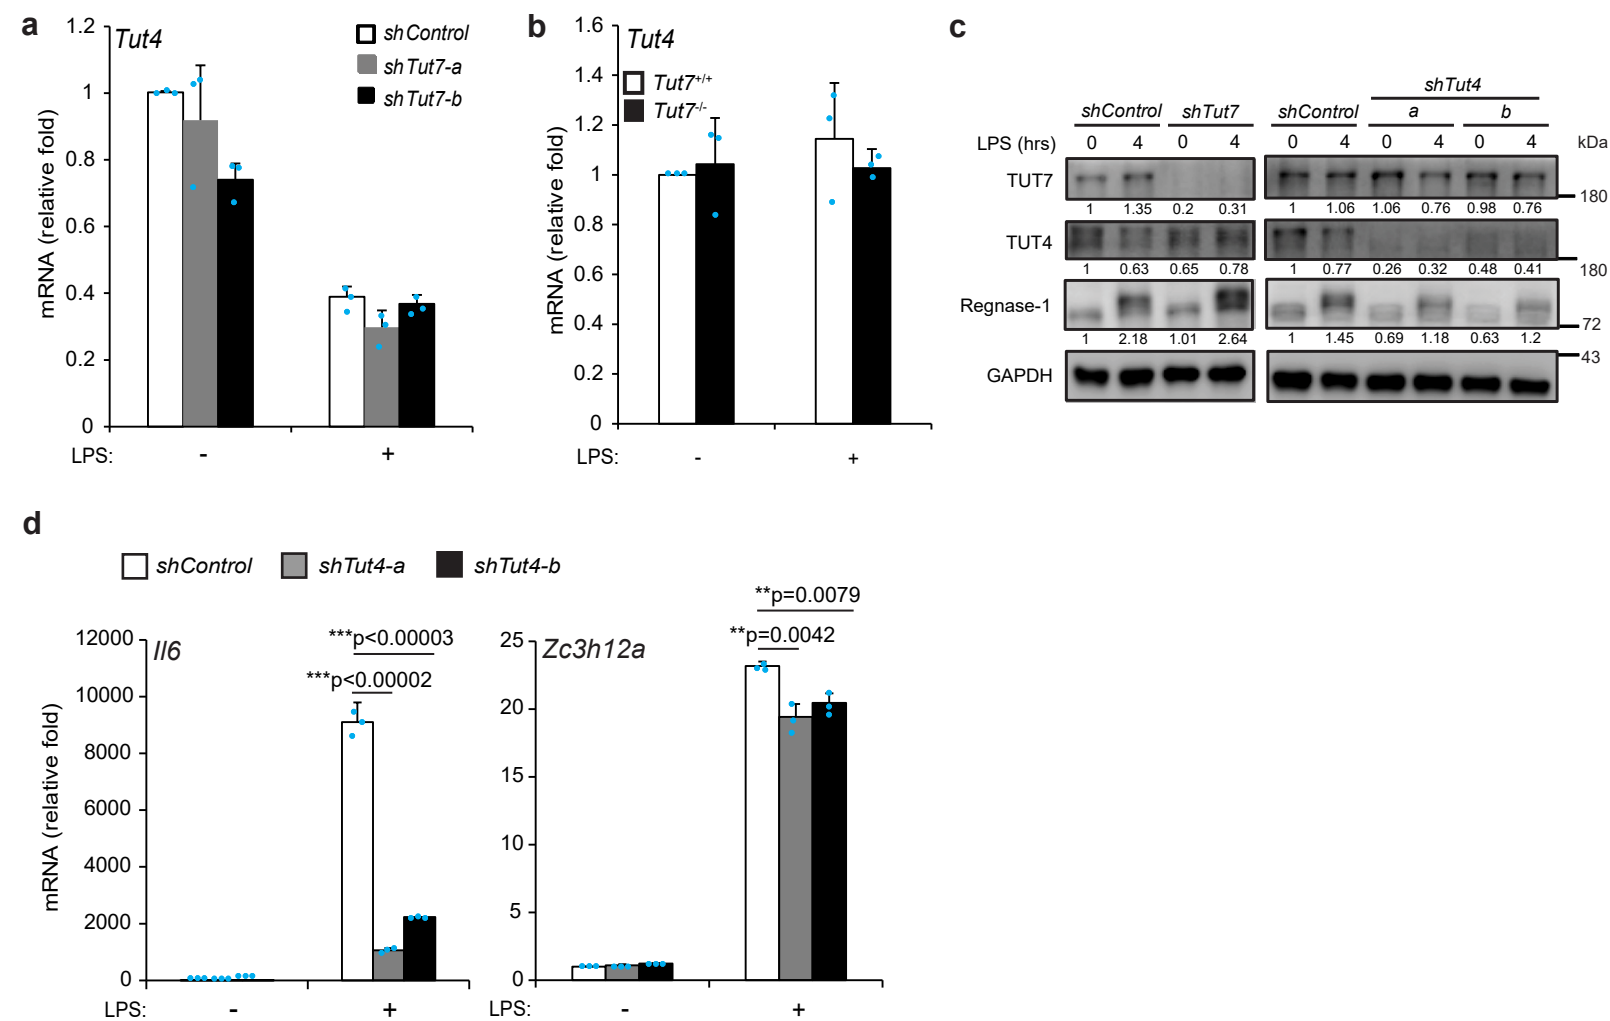

## Supplementary Figure 10. Depletion of TUT4 decreases *Zc3h12a* expression in LPS-stimulated macrophages.

(a, b) Control and *shTut7*-expressing RAW 264.7 macrophages (a) and wild-type and *Tut7*<sup>-/-</sup> BMDMs (b) were treated with 100 ng/ml of LPS for 4 hr. The expression of *Tut4* mRNA was analyzed by RT-qPCR. (c) Control-, *shTut7*- and *shTut4*-expressing RAW 264.7 macrophages were challenged with 100 ng/ml of LPS for the indicated periods of time. The expressions of TUT7, TUT4, and Regnase-1 proteins were analyzed by immunoblotting. (d) Control and *shTut4*-expressing RAW 264.7 macrophages were stimulated with 100 ng/ml of LPS for 4 hr. The expression of *Ii6* and *Zc3h12a* was analyzed by RT-qPCR. Data presented are representative of three independent experiments with triplicates in each experiment (error bars, mean  $\pm$  S.D.). The *p* values were obtained from two-tailed Student's *t*-test and are shown in the figure if *p* < 0.05. Source data are provided as a Source Data file.

## Supplementary Table 1

Complete blood counts of *Tut7<sup>+/+</sup>* and *Tut7<sup>-/-</sup>* mice

| Parameter        | <i>Tut7<sup>+/+</sup></i> | <i>Tut7<sup>-/-</sup></i> | P-value |
|------------------|---------------------------|---------------------------|---------|
| RBC (M/uL)       | 10.54±0.54                | 10.22±0.58                | 0.41    |
| HGB (g/dL)       | 15.88±0.57                | 15.35±0.79                | 0.28    |
| WBC (K/uL)       | 10.33±2.60                | 6.89±2.31                 | 0.07    |
| Lymphocytes (%)  | 85.94±2.47                | 87.65±2.21                | 0.65    |
| Granulocytes (%) | 14.05±0.87                | 12.37±0.15                | 0.69    |

Data presented are the average values (mean ± SD) obtained from five *Tut7<sup>+/+</sup>* and *Tut7<sup>-/-</sup>* mice. Source data are provided as a Source Data file.

## Supplementary Table 2. Downregulated innate immune-related genes in *Tut7<sup>-/-</sup>* mice compared to *Tut7<sup>+/+</sup>* mice upon LPS treatment.

| ID            | logFC     | -Log10(PValue) | Description                           |
|---------------|-----------|----------------|---------------------------------------|
| <i>Cd24a</i>  | -3.135596 | 5.421557049    | CD24a antigen                         |
| <i>Il23a</i>  | -2.526794 | 3.604987734    | interleukin 23, alpha subunit p19     |
| <i>Il6</i>    | -1.984501 | 51.70215063    | interleukin 6                         |
| <i>Ccl17</i>  | -1.861305 | 3.662956589    | chemokine (C-C motif) ligand 17       |
| <i>Igf2</i>   | -1.837911 | 1.717930791    | insulin-like growth factor 2          |
| <i>Cd55</i>   | -1.72727  | 3.811074894    | CD55 molecule                         |
| <i>Il23r</i>  | -1.618184 | 1.794381129    | interleukin 23 receptor               |
| <i>Cav1</i>   | -1.461788 | 30.28898137    | caveolin 1                            |
| <i>Havcr2</i> | -1.329088 | 6.429341459    | hepatitis A virus cellular receptor 2 |
| <i>Hmgb2</i>  | -1.304431 | 19.46858673    | high mobility group box 2             |
| <i>Axl</i>    | -1.247568 | 33.02833109    | AXL receptor tyrosine kinase          |

|                 |           |             |                                                                                                       |
|-----------------|-----------|-------------|-------------------------------------------------------------------------------------------------------|
| <i>Cx3cl1</i>   | -1.2455   | 12.48041126 | chemokine (C-X3-C motif) ligand 1                                                                     |
| <i>Il12b</i>    | -1.234514 | 12.91373427 | interleukin 12b                                                                                       |
| <i>Ciita</i>    | -1.204109 | 3.470063909 | class II transactivator                                                                               |
| <i>Il12a</i>    | -1.16167  | 3.221540796 | interleukin 12a                                                                                       |
| <i>H2-Ab1</i>   | -1.109272 | 22.17037381 | histocompatibility 2, class II antigen A, beta 1                                                      |
| <i>Pvr</i>      | -1.098944 | 14.24350862 | poliovirus receptor                                                                                   |
| <i>Gbp8</i>     | -1.098314 | 5.060946887 | guanylate-binding protein 8                                                                           |
| <i>Cdc42ep2</i> | -1.077362 | 11.2014694  | CDC42 effector protein (Rho GTPase binding) 2                                                         |
| <i>Clec5a</i>   | -1.031005 | 9.373884692 | C-type lectin domain family 5, member a                                                               |
| <i>Clec4n</i>   | -1.02779  | 4.242482306 | C-type lectin domain family 4, member n                                                               |
| <i>H2-Aa</i>    | -1.02718  | 15.13981093 | histocompatibility 2, class II antigen A, alpha                                                       |
| <i>Cfh</i>      | -0.985688 | 4.053349108 | complement component factor h                                                                         |
| <i>H2-Eb1</i>   | -0.984836 | 14.45052409 | histocompatibility 2, class II antigen E beta                                                         |
| <i>Clec4e</i>   | -0.937514 | 16.37023462 | C-type lectin domain family 4, member e                                                               |
| <i>Csf1</i>     | -0.88738  | 15.65079796 | colony stimulating factor 1 (macrophage)                                                              |
| <i>Matr3</i>    | -0.862964 | 6.246464825 | matrin 3                                                                                              |
| <i>Cd74</i>     | -0.814547 | 14.95222881 | CD74 antigen (invariant polypeptide of major histocompatibility complex, class II antigen-associated) |
| <i>Ipo7</i>     | -0.808549 | 5.19946776  | importin 7                                                                                            |



|                 |           |             |                                                             |
|-----------------|-----------|-------------|-------------------------------------------------------------|
| <i>Mapkapk3</i> | -0.801195 | 8.305054078 | mitogen-activated protein kinase-activated protein kinase 3 |
| <i>Gfi1</i>     | -0.799736 | 3.393528076 | growth factor independent 1                                 |
| <i>Ulbp1</i>    | -0.792979 | 2.269593044 | UL16 binding protein 1                                      |
| <i>Il34</i>     | -0.786842 | 1.759112398 | interleukin 34                                              |
| <i>Ifnb1</i>    | -0.773562 | 1.321670474 | interferon beta 1, fibroblast                               |
| <i>Gbp4</i>     | -0.759821 | 7.391136547 | guanylate binding protein 4                                 |
| <i>Gbp7</i>     | -0.72904  | 6.524894573 | guanylate binding protein 7                                 |
| <i>Syncrip</i>  | -0.722906 | 5.805839438 | synaptotagmin binding, cytoplasmic RNA interacting protein  |
| <i>Stat5a</i>   | -0.710013 | 10.42422066 | signal transducer and activator of transcription 5A         |
| <i>Il27</i>     | -0.709866 | 10.71025815 | interleukin 27                                              |
| <i>Erbin</i>    | -0.68832  | 6.980924104 | ErbB2 interacting protein                                   |
| <i>Ccl3</i>     | -0.684445 | 11.62584377 | chemokine (C-C motif) ligand 3                              |
| <i>Pspc1</i>    | -0.683911 | 2.900381304 | paraspeckle protein 1                                       |
| <i>Tnf</i>      | -0.676368 | 10.39067318 | tumor necrosis factor                                       |
| <i>Ptpn2</i>    | -0.667273 | 4.269843931 | protein tyrosine phosphatase, non-receptor type 2           |
| <i>Ticam2</i>   | -0.653711 | 3.942509525 | toll-like receptor adaptor molecule 2                       |
| <i>Naip6</i>    | -0.63422  | 3.85727446  | NLR family, apoptosis inhibitory protein 6                  |
| <i>Kynu</i>     | -0.62817  | 1.678460844 | kynureninase (L-kynurenine hydrolase)                       |
| <i>Nlrp1b</i>   | -0.623351 | 1.663532706 | NLR family, pyrin domain containing 1B                      |
| <i>Tarm1</i>    | -0.619401 | 5.995655294 | T cell-interacting, activating receptor on myeloid cells 1  |

|                |           |             |                                                               |
|----------------|-----------|-------------|---------------------------------------------------------------|
| <i>Eif2ak2</i> | -0.572986 | 3.987378793 | eukaryotic translation initiation factor 2-alpha kinase 2     |
| <i>Pde12</i>   | -0.572702 | 3.328444107 | phosphodiesterase 12                                          |
| <i>Parp14</i>  | -0.556341 | 4.007398583 | poly (ADP-ribose) polymerase family, member 14                |
| <i>Kif5b</i>   | -0.556322 | 2.528442604 | kinesin family member 5B                                      |
| <i>Ddx3x</i>   | -0.555085 | 3.763445519 | DEAD/H (Asp-Glu-Ala-Asp/His) box polypeptide 3, X-linked      |
| <i>Ifih1</i>   | -0.553725 | 4.497651001 | interferon induced with helicase C domain 1                   |
| <i>Setd2</i>   | -0.551956 | 4.366841638 | SET domain containing 2                                       |
| <i>Il18</i>    | -0.545008 | 4.555487938 | interleukin 18                                                |
| <i>Otud4</i>   | -0.544814 | 2.647451562 | OTU domain containing 4                                       |
| <i>Nlrp3</i>   | -0.540917 | 7.265137173 | NLR family, pyrin domain containing 3                         |
| <i>C3</i>      | -0.534549 | 7.174763754 | complement component 3                                        |
| <i>Ptpn22</i>  | -0.522712 | 1.480604362 | protein tyrosine phosphatase, non-receptor type 22 (lymphoid) |
| <i>Vamp7</i>   | -0.521502 | 1.927807557 | vesicle-associated membrane protein 7                         |
| <i>Anxa1</i>   | -0.521458 | 5.808244421 | annexin A1                                                    |
| <i>Ptprs</i>   | -0.51944  | 2.659899831 | protein tyrosine phosphatase, receptor type, S                |
| <i>Rps6kb1</i> | -0.501165 | 1.915149066 | ribosomal protein S6 kinase, polypeptide 1                    |
| <i>Tnfaip3</i> | -0.500157 | 6.358249128 | tumor necrosis factor, alpha-induced protein 3                |

|                |           |             |                                                         |
|----------------|-----------|-------------|---------------------------------------------------------|
| <i>Oas2</i>    | -0.4913   | 5.639767256 | 2'-5' oligoadenylate synthetase 2                       |
| <i>Trp53</i>   | -0.490689 | 4.359370541 | transformation related protein 53                       |
| <i>Pum2</i>    | -0.488137 | 2.866159039 | pumilio RNA-binding family member 2                     |
| <i>Ripk2</i>   | -0.479839 | 5.297307437 | receptor (TNFRSF)-interacting serine-threonine kinase 2 |
| <i>Cnot7</i>   | -0.455605 | 2.371130522 | CCR4-NOT transcription complex, subunit 7               |
| <i>Ddx60</i>   | -0.455225 | 2.14782721  | DEAD (Asp-Glu-Ala-Asp) box polypeptide 60               |
| <i>Irak2</i>   | -0.423093 | 4.260395819 | interleukin-1 receptor-associated kinase 2              |
| <i>Ptx3</i>    | -0.417714 | 1.430087123 | pentraxin related gene                                  |
| <i>Cx3cr1</i>  | -0.413036 | 1.420295423 | chemokine (C-X3-C motif) receptor 1                     |
| <i>Pycard</i>  | -0.412247 | 3.056888143 | PYD and CARD domain containing                          |
| <i>Gbp5</i>    | -0.408944 | 3.362980352 | guanylate binding protein 5                             |
| <i>Itch</i>    | -0.405739 | 1.945764206 | itchy, E3 ubiquitin protein ligase                      |
| <i>Ccl4</i>    | -0.405721 | 4.459932336 | chemokine (C-C motif) ligand 4                          |
| <i>Nr1h3</i>   | -0.396951 | 1.571874339 | nuclear receptor subfamily 1, group H, member 3         |
| <i>Trim30a</i> | -0.396761 | 2.610211877 | tripartite motif-containing 30A                         |
| <i>Jak2</i>    | -0.395868 | 2.623423382 | Janus kinase 2                                          |
| <i>Acod1</i>   | -0.387226 | 4.217437131 | aconitate decarboxylase 1                               |
| <i>Trim26</i>  | -0.382606 | 3.591936213 | tripartite motif-containing 26                          |
| <i>Herc6</i>   | -0.379875 | 2.063363487 | hect domain and RLD 6                                   |
| <i>Tlr1</i>    | -0.37802  | 3.116442545 | toll-like receptor 1                                    |

|                |           |             |                                                                                          |
|----------------|-----------|-------------|------------------------------------------------------------------------------------------|
| <i>Stat5b</i>  | -0.369779 | 3.060244659 | signal transducer and activator of transcription 5B                                      |
| <i>Rab20</i>   | -0.347454 | 1.586468946 | RAB20, member RAS oncogene family                                                        |
| <i>Map3k5</i>  | -0.340709 | 1.386843335 | mitogen-activated protein kinase kinase kinase 5                                         |
| <i>Dhx9</i>    | -0.331155 | 1.382933383 | DEAH (Asp-Glu-Ala-His) box polypeptide 9                                                 |
| <i>Peli1</i>   | -0.32758  | 1.984949843 | pellino 1                                                                                |
| <i>Cd36</i>    | -0.326664 | 1.576352146 | CD36 molecule                                                                            |
| <i>Tlr3</i>    | -0.326588 | 1.63945389  | toll-like receptor 3                                                                     |
| <i>Tlr2</i>    | -0.325378 | 3.015650802 | toll-like receptor 2                                                                     |
| <i>Trim12a</i> | -0.315185 | 1.993635232 | tripartite motif-containing 12A                                                          |
| <i>Syk</i>     | -0.314793 | 2.661299373 | spleen tyrosine kinase                                                                   |
| <i>Hspd1</i>   | -0.290518 | 1.550802793 | heat shock protein 1 (chaperonin)                                                        |
| <i>Ube2k</i>   | -0.289548 | 1.56803693  | ubiquitin-conjugating enzyme E2K                                                         |
| <i>Aim2</i>    | -0.289385 | 1.643424219 | absent in melanoma 2                                                                     |
| <i>Ccl5</i>    | -0.28319  | 2.258670106 | chemokine (C-C motif) ligand 5                                                           |
| <i>Cybb</i>    | -0.276479 | 1.452993681 | cytochrome b-245, beta polypeptide                                                       |
| <i>Gbp6</i>    | -0.276243 | 1.410450066 | guanylate binding protein 6                                                              |
| <i>Stx11</i>   | -0.272285 | 1.865810829 | syntaxin 11                                                                              |
| <i>Sfpq</i>    | -0.271379 | 1.981463977 | splicing factor proline/glutamine rich (polypyrimidine tract binding protein associated) |
| <i>Irf1</i>    | -0.258622 | 1.9080788   | interferon regulatory factor 1                                                           |

|               |           |             |                                           |
|---------------|-----------|-------------|-------------------------------------------|
| <i>Irgm1</i>  | -0.24082  | 1.664194608 | immunity-related GTPase family M member 1 |
| <i>Sp110</i>  | -0.223047 | 1.556826228 | Sp110 nuclear body protein                |
| <i>Tnip1</i>  | -0.21941  | 1.415031839 | TNFAIP3 interacting protein 1             |
| <i>Cd14</i>   | -0.214713 | 1.367309852 | CD14 antigen                              |
| <i>Ccl9</i>   | -0.214454 | 1.51595478  | chemokine (C-C motif) ligand 9            |
| <i>Cxcl16</i> | -0.198174 | 1.320161239 | chemokine (C-X-C motif) ligand 16         |

**Supplementary Table 3. Upregulated innate immune-related genes in *Tut7*<sup>-/-</sup>**

*-/-* mice compared to *Tut7*<sup>+/+</sup> mice upon LPS treatment.

| ID            | logFC     | -Log10(PValue) | Description                                              |
|---------------|-----------|----------------|----------------------------------------------------------|
| <i>Irf7</i>   | 0.2097138 | 1.460260967    | interferon regulatory factor 7                           |
| <i>Hck</i>    | 0.2246322 | 1.434773819    | hemopoietic cell kinase                                  |
| <i>Dhx58</i>  | 0.2289099 | 1.504684939    | DEXH (Asp-Glu-X-His) box polypeptide 58                  |
| <i>Capg</i>   | 0.2428611 | 1.511222408    | capping protein (actin filament), gelsolin-like          |
| <i>C1qb</i>   | 0.2482706 | 1.800345117    | complement component 1, q subcomponent, beta polypeptide |
| <i>Actr3</i>  | 0.2569312 | 2.00764736     | ARP3 actin-related protein 3                             |
| <i>Trem2</i>  | 0.2575944 | 1.466372205    | triggering receptor expressed on myeloid cells 2         |
| <i>Rpl13a</i> | 0.2633799 | 1.557301776    | ribosomal protein L13A                                   |
| <i>Elf4</i>   | 0.2671944 | 1.709339995    | E74-like factor 4 (ets domain transcription factor)      |
| <i>Arf6</i>   | 0.2999929 | 2.00478282     | ADP-ribosylation factor 6                                |

|                  |           |             |                                                              |
|------------------|-----------|-------------|--------------------------------------------------------------|
| <i>Tlr13</i>     | 0.31681   | 1.407813884 | toll-like receptor 13                                        |
| <i>Tnip3</i>     | 0.3173188 | 2.634599721 | TNFAIP3 interacting protein 3                                |
| <i>Pik3ap1</i>   | 0.3233569 | 2.902917121 | phosphoinositide-3-kinase adaptor protein<br>1               |
| <i>Was</i>       | 0.3266693 | 1.795528748 | Wiskott-Aldrich syndrome                                     |
| <i>Ptpn6</i>     | 0.3304218 | 2.674199993 | protein tyrosine phosphatase, non-receptor<br>type 6         |
| <i>C1qc</i>      | 0.3379062 | 2.831293864 | complement component 1, q<br>subcomponent, C chain           |
| <i>Lgals3</i>    | 0.3477593 | 3.119492954 | lectin, galactose binding, soluble 3                         |
| <i>Tnfaip8l2</i> | 0.3573362 | 1.55822057  | tumor necrosis factor, alpha-induced<br>protein 8-like 2     |
| <i>Trim28</i>    | 0.3615663 | 2.350262131 | tripartite motif-containing 28                               |
| <i>Adam15</i>    | 0.3758911 | 2.630999153 | a disintegrin and metallopeptidase domain<br>15 (metargidin) |
| <i>Stat2</i>     | 0.3826317 | 3.744086942 | signal transducer and activator of<br>transcription 2        |
| <i>Trim56</i>    | 0.4090441 | 2.112135731 | tripartite motif-containing 56                               |
| <i>Gpatch3</i>   | 0.414884  | 1.416364384 | G patch domain containing 3                                  |
| <i>Fcgr1</i>     | 0.4212162 | 4.739669051 | Fc receptor, IgG, high affinity I                            |
| <i>Cd84</i>      | 0.4257549 | 3.082176283 | CD84 antigen                                                 |
| <i>Cebpg</i>     | 0.4361607 | 1.543761897 | CCAAT/enhancer binding protein (C/EBP),<br>gamma             |
| <i>Trim35</i>    | 0.4432222 | 2.988112912 | tripartite motif-containing 35                               |

|                |           |             |                                                           |
|----------------|-----------|-------------|-----------------------------------------------------------|
| <i>Lyn</i>     | 0.460869  | 5.388152444 | LYN proto-oncogene, Src family tyrosine kinase            |
| <i>Tmem173</i> | 0.4739144 | 2.616915911 | transmembrane protein 173                                 |
| <i>Nos2</i>    | 0.4803586 | 5.613983106 | nitric oxide synthase 2, inducible                        |
| <i>Mcoln2</i>  | 0.4916815 | 4.337696988 | mucolipin 2                                               |
| <i>Myo1f</i>   | 0.4978802 | 4.198070509 | myosin IF                                                 |
| <i>Trim11</i>  | 0.5022067 | 2.042147715 | tripartite motif-containing 11                            |
| <i>Ccl6</i>    | 0.5273432 | 4.600546031 | chemokine (C-C motif) ligand 6                            |
| <i>Flot1</i>   | 0.5285952 | 3.658334524 | flotillin 1                                               |
| <i>Cfb</i>     | 0.5463738 | 6.671568182 | complement factor B                                       |
| <i>Klrk1</i>   | 0.5672035 | 1.756835845 | killer cell lectin-like receptor subfamily K, member 1    |
| <i>Serinc5</i> | 0.6085892 | 3.06862055  | serine incorporator 5                                     |
| <i>Vav1</i>    | 0.6333864 | 7.840941225 | vav 1 oncogene                                            |
| <i>Vps26b</i>  | 0.6391499 | 2.914760581 | VPS26 retromer complex component B                        |
| <i>Trim8</i>   | 0.6391951 | 3.12960658  | tripartite motif-containing 8                             |
| <i>Nlrp1a</i>  | 0.6719072 | 1.625785873 | NLR family, pyrin domain containing 1A                    |
| <i>Nrros</i>   | 0.7004131 | 4.73267607  | negative regulator of reactive oxygen species             |
| <i>Fbxo9</i>   | 0.7252317 | 1.918022179 | f-box protein 9                                           |
| <i>Ccl7</i>    | 0.7470881 | 11.39347083 | chemokine (C-C motif) ligand 7                            |
| <i>Slamf1</i>  | 0.7602543 | 3.311767027 | signaling lymphocytic activation molecule family member 1 |

|                  |           |             |                                                                        |
|------------------|-----------|-------------|------------------------------------------------------------------------|
| <i>Pik3cd</i>    | 0.7655641 | 11.30202983 | phosphatidylinositol-4,5-bisphosphate 3-kinase catalytic subunit delta |
| <i>Zyx</i>       | 0.7752949 | 13.60505266 | zyxin                                                                  |
| <i>Slamf8</i>    | 0.8082164 | 6.124247053 | SLAM family member 8                                                   |
| <i>Fcna</i>      | 0.8733257 | 2.593930952 | ficolin A                                                              |
| <i>Msrb1</i>     | 0.8811139 | 8.832846406 | methionine sulfoxide reductase B1                                      |
| <i>Evl</i>       | 0.8902098 | 12.84713227 | Ena-vasodilator stimulated phosphoprotein                              |
| <i>Clec7a</i>    | 0.9201076 | 10.32262726 | C-type lectin domain family 7, member a                                |
| <i>Rab11fip5</i> | 0.9420545 | 12.6469561  | RAB11 family interacting protein 5 (class I)                           |
| <i>Ly86</i>      | 0.97787   | 16.89464429 | lymphocyte antigen 86                                                  |
| <i>Dusp10</i>    | 0.9785667 | 1.573267822 | dual specificity phosphatase 10                                        |
| <i>C1qa</i>      | 0.99831   | 19.6063915  | complement component 1, q subcomponent, alpha polypeptide              |
| <i>Tyro3</i>     | 1.0846386 | 1.304189833 | TYRO3 protein tyrosine kinase 3                                        |
| <i>Cd300lf</i>   | 1.1083051 | 2.162536528 | CD300 molecule like family member F                                    |
| <i>Rab7b</i>     | 1.1551707 | 11.18568121 | RAB7B, member RAS oncogene family                                      |
| <i>Lcn2</i>      | 1.1578147 | 13.32710492 | lipocalin 2                                                            |
| <i>Esr1</i>      | 1.3538468 | 1.391380823 | estrogen receptor 1 (alpha)                                            |
| <i>Ccl8</i>      | 1.4551744 | 6.416002475 | chemokine (C-C motif) ligand 8                                         |
| <i>Rab43</i>     | 1.5103638 | 30.91492272 | RAB43, member RAS oncogene family                                      |
| <i>Ccr1</i>      | 1.5378291 | 9.798548168 | chemokine (C-C motif) receptor 1                                       |
| <i>S100a8</i>    | 1.5670831 | 1.557707902 | S100 calcium binding protein A8 (calgranulin A)                        |
| <i>Padi4</i>     | 1.8867563 | 1.78554161  | peptidyl arginine deiminase, type IV                                   |



|             |           |            |                  |
|-------------|-----------|------------|------------------|
| <i>Arg2</i> | 2.1301855 | 4.80245293 | arginase type II |
|-------------|-----------|------------|------------------|

#### Supplementary Table 4

Primer pairs for plasmid construction.

|                           |                                        |
|---------------------------|----------------------------------------|
| <i>Tut7</i> -NotI Forward | ATAAGAATGCGGCCGCTGGGAGATACAGCAAACCTTAC |
| <i>Tut7</i> -Sacl Reverse | GTTTAGAGCTCTCCTGGTGGGCTG               |
| <i>Tut7</i> -Sacl Forward | AGGAGAGCTCTGGCTGTGTCCAG                |
| <i>Tut7</i> -Apal Reverse | ATATGGGCCCTCATGTAAAAGCACTGCCTGGAG      |

|                             |                                 |
|-----------------------------|---------------------------------|
| h <i>TUT7</i> Forward       | GGGAGATACAGCAAACCTTACTTTGTGAAGC |
| h <i>TUT7</i> -Apal Reverse | ATATGGGCCCTCATGTAAAAGCACTGCCTG  |
| h <i>TUT7</i> _DADA Forward | CAAACAGAGTGCCCTTGCCGTCTGTATG    |
| h <i>TUT7</i> _DADA Reverse | CATACAGACGGCAAGGGCACTCTGTTTG    |

|                                               |                                     |
|-----------------------------------------------|-------------------------------------|
| <i>IL-6</i> 3'-UTR <sub>56-104</sub> Forward  | CTAGTCTAGAAATATATCCTGTTGTCAGGTATCTG |
| <i>IL-6</i> 3'-UTR <sub>56-104</sub> Reverse  | CTAGTCTAGACATATTGTCAGTTCTTCGTAGAG   |
| <i>IL-6</i> 3'-UTR <sub>104-224</sub> Forward | CTAGTCTAGAGACAATATGAATGTTGGGACAC    |
| <i>IL-6</i> 3'-UTR <sub>104-224</sub> Reverse | CTAGTCTAGACATTTCAAGTGACACTTCAT      |

|                         |                                     |
|-------------------------|-------------------------------------|
| miR-224 mutant Forward  | GTCAGGTATCTGCCGTCTGTTGTTCTCTAC      |
| miR-224 mutant Reverse  | GTAGAGAACAACAGACGGCAGATACCTGAC      |
| miR-376a mutant Forward | CTTATGTTGTTCTCGAAGCAGAACTGACAATATG  |
| miR-376a mutant Reverse | CATATTGTCAGTTCTGCTTCGAGAACAACATAAG  |
| miR-223 mutant Forward  | GTTCTCTACGAAGAAATTAATATGAATGTTGGG   |
| miR-223 mutant Reverse  | CCCAACATTCATATTTTAATTTCTTCGTAGAGAAC |

|                                                     |                                          |
|-----------------------------------------------------|------------------------------------------|
| <i>IL-6</i> 3'-UTR <sub>56-104</sub> _m1<br>Forward | CCGGAATTCATGAATTGCTAATTTAAATATGTTTTTAAAG |
| <i>IL-6</i> 3'-UTR <sub>56-104</sub> _m1<br>Reverse | CCGGAATTCAACTTATACATTCCAAGAAACCATCTG     |
| <i>IL-6</i> 3'-UTR <sub>56-104</sub> _m2<br>Forward | CCGGAATTCAATGTTATATGTTATAGTTTTGAAATGATAA |
| <i>IL-6</i> 3'-UTR <sub>56-104</sub> _m2<br>Reverse | CCGGAATTCCACTTCATAAAAATAATAAATATCAATCAT  |

|                                     |                                    |
|-------------------------------------|------------------------------------|
| <i>Zc3h12a</i> _EcoRI Forward       | ccgGAATTCATGAGTGACCCTTGTGGAACG     |
| <i>Zc3h12a</i> _XhoI Reverse        | cggCTCGAGTTACTCACTGAGGTGCTGGGAC    |
| <i>Zc3h12a</i> _ScaI Forward        | aaaAGTACTGGTCTGAGCCGTACCCATTAC     |
| <i>Zc3h12a</i> _3'-UTR_XhoI Reverse | cggCTCGAGGGCAATAGCTTTTTTTTTCTTTTAA |
| <i>Zc3h12a</i> _3'-UTR_XhoI Forward | cggCTCGAGGCCAGAAGGTGGCGCAA         |
| <i>Zc3h12a</i> _3'-UTR_XbaI Reverse | gcTCTAGAGGCAATAGCTTTTTTTTTCTTTTAA  |
| <i>Tnf</i> _CDS_EcoRI Forward       | ccgGAATTCATGAGCACAGAAAGCA          |
| <i>Tnf</i> _CDS_XhoI Reverse        | cggCTCGAGTCACAGAGCAATGACTCC        |
| <i>Tnf</i> _3'-UTR_XhoI Forward     | ccgCTCGAGAAGGGAATGGGT              |
| <i>Tnf</i> _3'-UTR_XhoI Reverse     | ccgCTCGAGTCACATTTCTTTTCCAAGCGA     |

|                                                         |                                 |
|---------------------------------------------------------|---------------------------------|
| <i>Zc3h12a</i> _3'-UTR <sub>1-358</sub> -XbaI Forward   | gcTCTAGAGCCAGAAGGTGGCGCAAGGG    |
| <i>Zc3h12a</i> _3'-UTR <sub>1-358</sub> -XbaI Reverse   | gcTCTAGACGTCCCAGGGACAGGGTG      |
| <i>Zc3h12a</i> _3'-UTR <sub>1-151</sub> -XbaI Reverse   | gcTCTAGACGCGGGGCCAGAACCAAT      |
| <i>Zc3h12a</i> _3'-UTR <sub>100-250</sub> -XbaI Forward | gcTCTAGAGCAAGGGAATCCTCAAACCAAAG |

|                                                         |                                |
|---------------------------------------------------------|--------------------------------|
| <i>Zc3h12a</i> _3'-UTR <sub>100-250</sub> -Xbal Reverse | gcTCTAGAGGATGGACGGCCTGACC      |
| <i>Zc3h12a</i> _3'-UTR <sub>210-358</sub> -Xbal Forward | gcTCTAGACTGTCATTTAAGGAGACGCTGC |
| <i>Zc3h12a</i> _3'-UTR <sub>338-698</sub> -Xbal Forward | gcTCTAGAGGAGGCATGGGGGAGCAGAG   |
| <i>Zc3h12a</i> _3'-UTR <sub>338-698</sub> -Xbal Reverse | gcTCTAGACAGCCTGCCTGGCAATAGC    |
| <i>Zc3h12a</i> _3'-UTR <sub>560-865</sub> -Xbal Forward | gcTCTAGAGTATGCTGTGTACAGAGGC    |
| <i>Zc3h12a</i> _3'-UTR <sub>560-865</sub> -Xbal Reverse | gcTCTAGAGGCAATAGCTTTTTTTTTTC   |

### Supplementary Table 5

Primer pairs for RT-qPCR

|                                  |                         |
|----------------------------------|-------------------------|
| Mouse <i>Cyclophilin</i> Forward | ATGTGCCAGGGTGGTGACTTT   |
| Mouse <i>Cyclophilin</i> Reverse | TTGCCATCCAGCCATTCAGTC   |
| Mouse <i>Il6</i> Forward         | ACAAGAAAGACAAAGCCAGAGTC |
| Mouse <i>Il6</i> Reverse         | ATTGGAAATTGGGGTAGGAAG   |
| Mouse <i>Il12b</i> Forward       | TGCAGATGAAGCCTTTGAAGA   |
| Mouse <i>Il12b</i> Reverse       | AACGCACCTTTCTGGTTACAC   |
| Mouse <i>Il1b</i> Forward        | GAACTCAACTGTGAAATGCCACC |
| Mouse <i>Il1b</i> Reverse        | CCACAGCCACAATGAGTGATACT |
| Mouse <i>Tnf</i> Forward         | GTCTACTGAACTTCGGGGTGATC |
| Mouse <i>Tnf</i> Reverse         | TCCACTTGGTGGTTTGCTACG   |
| Mouse <i>Nfkb1a</i> Forward      | TGCTGAGGCACTTCTGAAAGC   |
| Mouse <i>Nfkb1a</i> Reverse      | CTGCGTCAAGACTGCTACACT   |
| Mouse <i>Zc3h12a</i> Forward     | TATCACAGACCAGCACATCCTTC |
| Mouse <i>Zc3h12a</i> Reverse     | GTCTCGGTACGTGTCATTGGAG  |
| Mouse <i>Zc3h12c</i> Forward     | GTTGTAGTAGATGACGGTGAG   |
| Mouse <i>Zc3h12c</i> Reverse     | GTCAGGGCGGGACTGTTCTTT   |

|                           |                           |
|---------------------------|---------------------------|
| Mouse <i>Tut4</i> Forward | AGAGTGAACTTCGGTCTCTTCC    |
| Mouse <i>Tut4</i> Reverse | AACCATACAACCTCACTGAACATTC |

### Supplementary Table 6

Oligonucleotides used for cDNA library construction of TAIL-Seq.

|          |                                                                   |
|----------|-------------------------------------------------------------------|
| Linker-1 | CTGTAGGCACCATCAAT                                                 |
| p7_D701  | CAAGCAGAAGACGGCATAACGAGATCGAGTAAT<br>GTGACTGGAGTTCAGACGTGTGCTCTTC |
| p7_D702  | CAAGCAGAAGACGGCATAACGAGATTCTCCGGA<br>GTGACTGGAGTTCAGACGTGTGCTCTTC |
| p7_D703  | CAAGCAGAAGACGGCATAACGAGATAATGAGCG<br>GTGACTGGAGTTCAGACGTGTGCTCTTC |
| p7_D704  | CAAGCAGAAGACGGCATAACGAGATGGAATCTC<br>GTGACTGGAGTTCAGACGTGTGCTCTTC |
| p7_D705  | CAAGCAGAAGACGGCATAACGAGATTTCTGAAT<br>GTGACTGGAGTTCAGACGTGTGCTCTTC |
| p7_D706  | CAAGCAGAAGACGGCATAACGAGATACGAATTC<br>GTGACTGGAGTTCAGACGTGTGCTCTTC |
| p7_D708  | CAAGCAGAAGACGGCATAACGAGATGCGCATTA<br>GTGACTGGAGTTCAGACGTGTGCTCTTC |
| p7_D709  | CAAGCAGAAGACGGCATAACGAGATCATAGCCG<br>GTGACTGGAGTTCAGACGTGTGCTCTTC |
| p7_D710  | CAAGCAGAAGACGGCATAACGAGATTTGCGGGA<br>GTGACTGGAGTTCAGACGTGTGCTCTTC |
| p7_D711  | CAAGCAGAAGACGGCATAACGAGATGCGCGAGA                                 |

|             |                                                                          |
|-------------|--------------------------------------------------------------------------|
|             | GTGACTGGAGTTCAGACGTGTGCTCTTC                                             |
| p7_D712     | CAAGCAGAAGACGGCATAACGAGATCTATCGCT<br>GTGACTGGAGTTCAGACGTGTGCTCTTC        |
| Zc3h12a_F1  | <u>GTGACTGGAGTTCAGACGTGTGCTCTTCCGATCT</u><br>tttaatgaaaaagggtgacaaaataaa |
| Il6_F1      | GTGACTGGAGTTCAGACGTGTGCTCTTCCGATCT<br>tgtttagactgtcttcaacaaataaa         |
| p5_D501     | AATGATACGGCGACCACCGAGATCTACACTATAGCCT<br>ACACTCTTCCCTACACGACGC           |
| p5_D502     | AATGATACGGCGACCACCGAGATCTACACATAGAGGC<br>ACACTCTTCCCTACACGACGC           |
| p5_D508     | AATGATACGGCGACCACCGAGATCTACACGTAAGTAC<br>ACACTCTTCCCTACACGACGC           |
| RT linker-1 | <u>ACACTCTTCCCTACACGACGCTCTTCCGATCT</u><br>ATTGATGGTGCCTACAG             |

### Supplementary Table 7

RNA oligomers used for RNA EMSA and competition assay.

|                                 |                                                                                 |
|---------------------------------|---------------------------------------------------------------------------------|
| Cy3-Zc3h12a-stem loop Wild-type | Cy3-ACAGGUCAGAAGUGAUCACCCUGUU<br><b><u>GAUACACAUUGUAUC</u></b> UCUGUCAUUU       |
| Zc3h12a-stem loop Wild-type     | ACAGGUCAGAAGUGAUCACCCUGUU<br><b><u>GAUACACAUUGUAUC</u></b> UCUGUCAUUU           |
| Zc3h12a-stem loop St1m          | ACAGGUCAGAAGUGAUCACCCUGUU<br><b><u>GAAUGACAUUGUAUC</u></b> UCUGUCAUUU           |
| Zc3h12a-stem loop St2m          | ACAGGUCAGAAGUGAUCACCCUGUU<br><b><u>GAUACACAUUCAUUC</u></b> UCUGUCAUUU           |
| Zc3h12a-stem loop St(1+2)m      | ACAGGUCAGAAGUGAUCACCCUGUU<br><b><u>GAAUGACAUUCAUUC</u></b> UCUGUCAUUU           |
| Il6-stem loop Wild-type         | AAUAUAUCCUGUUGUCAGGUAUCUGACUUA<br><b><u>UGUUGUUCUCUACGAAGAACUGACA</u></b> AUAUG |

Fig. 1a

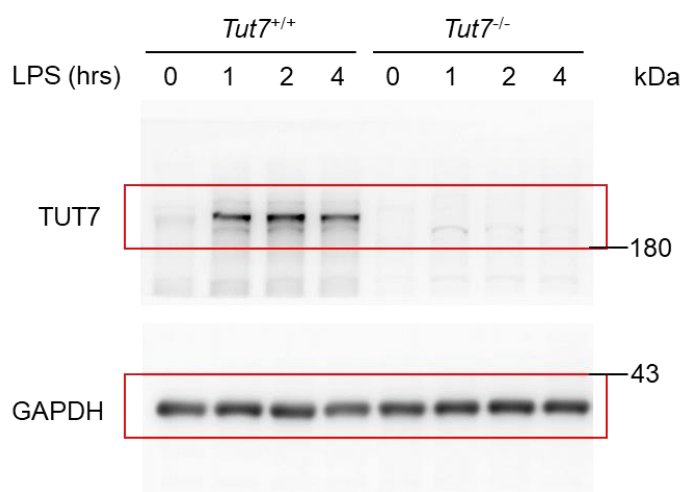

Fig. 1e

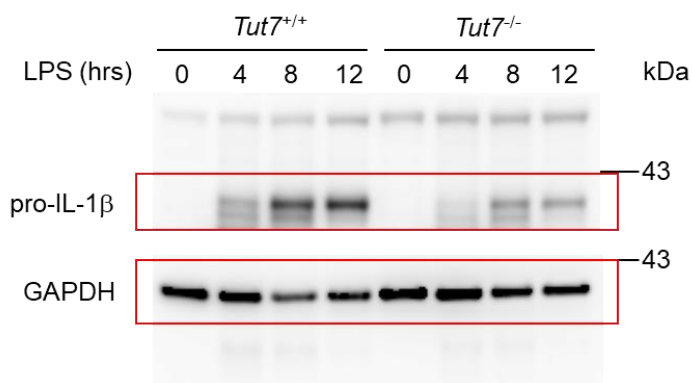

Fig. 1f

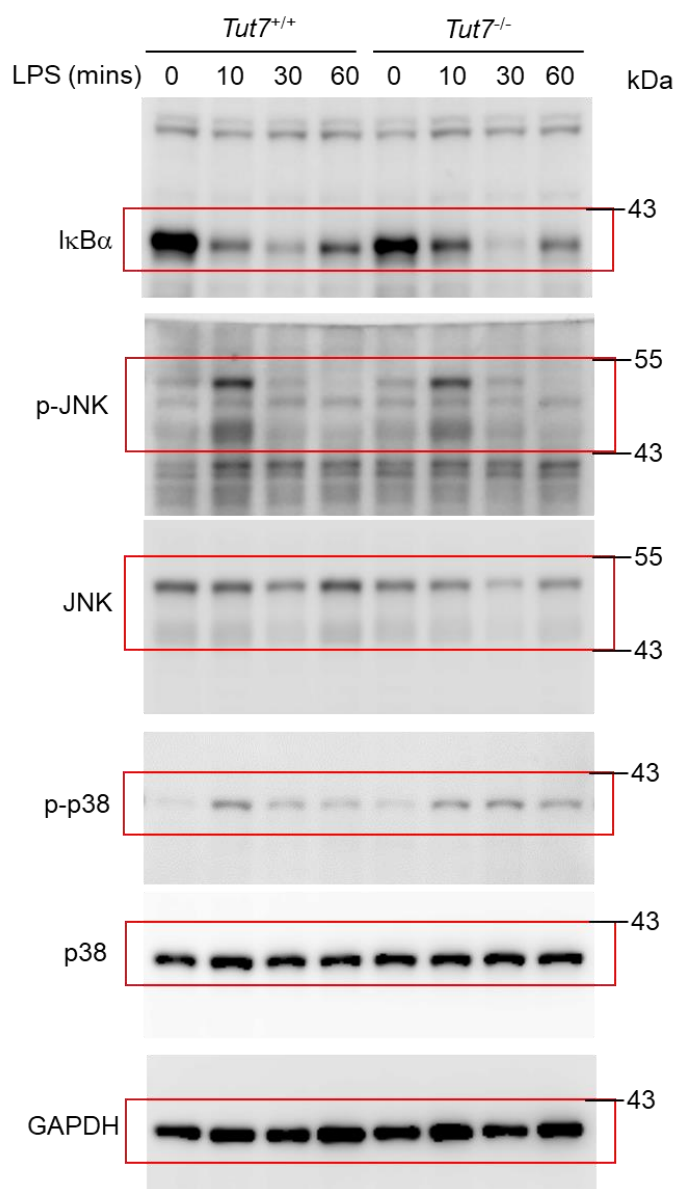

Fig. 2a

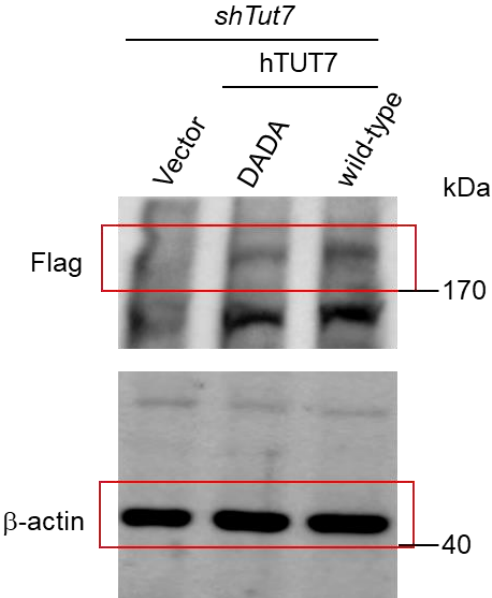

Fig. 3a

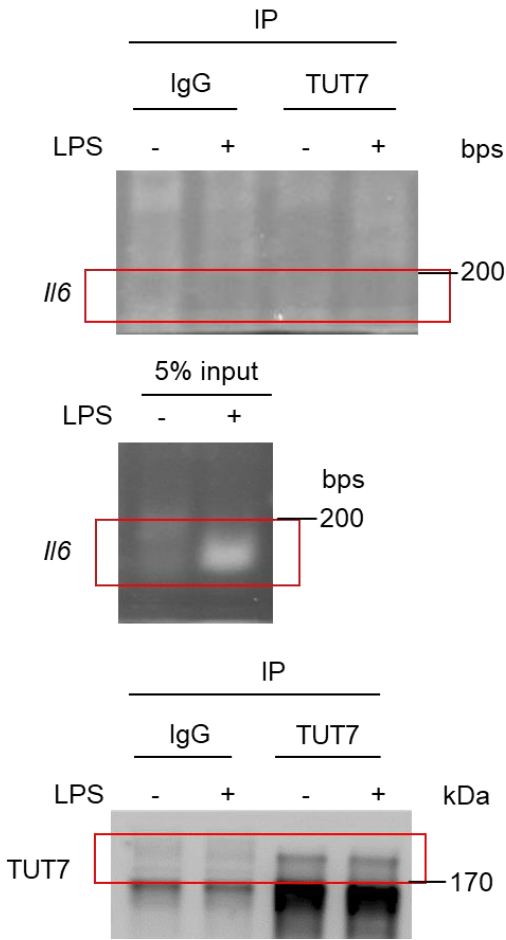

Fig. 3b

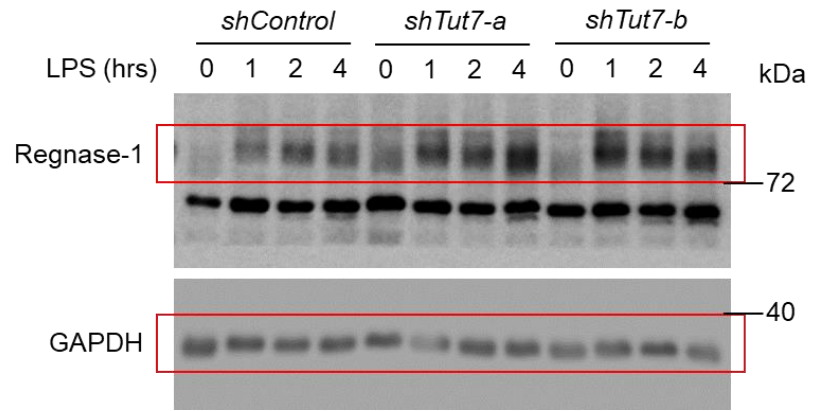

Fig. 3d

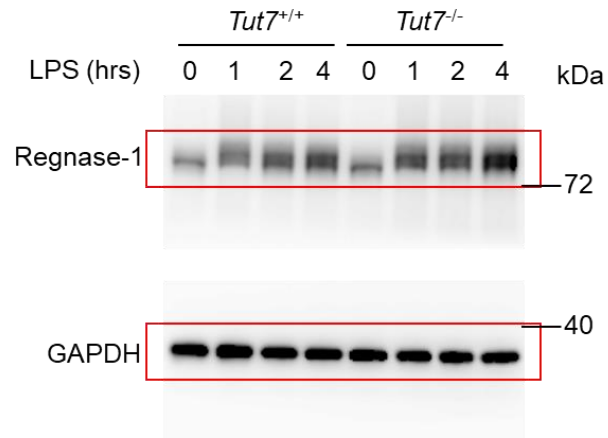

Fig. 3g

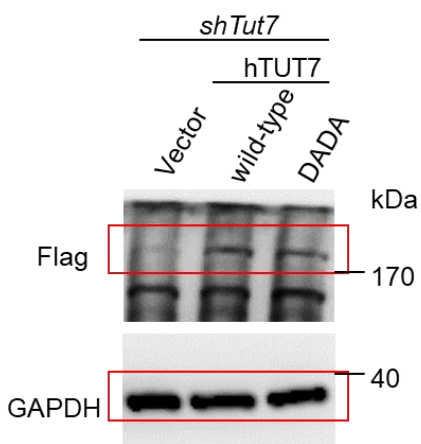





Fig. 5a

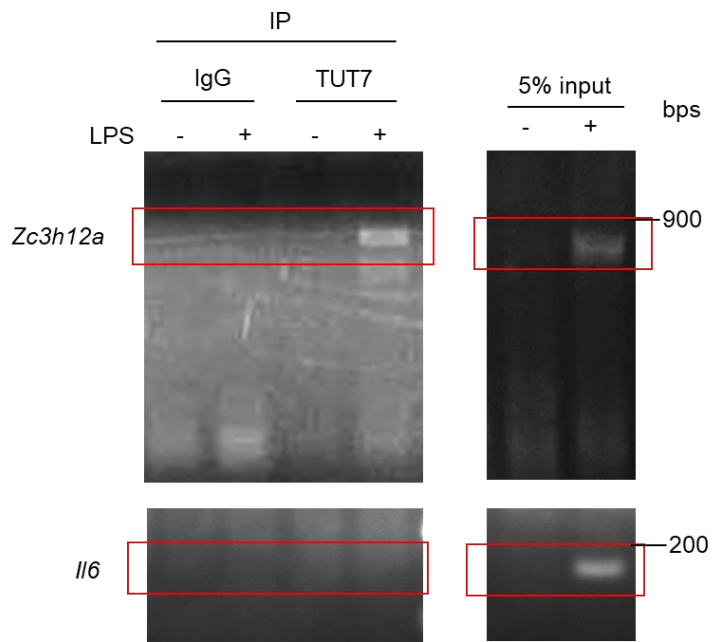

Fig. 5f (top panel)

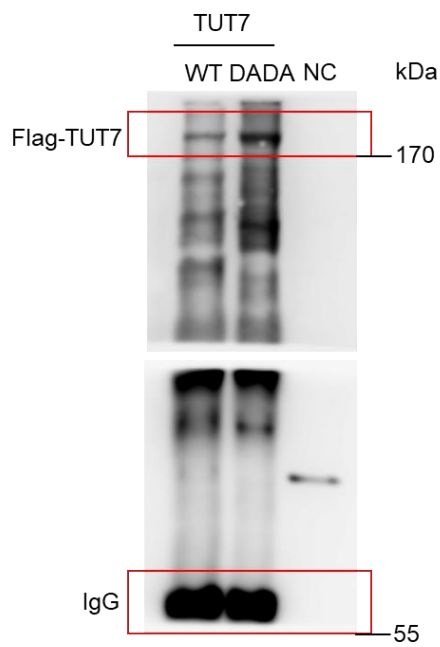

Supplementary figure 1a

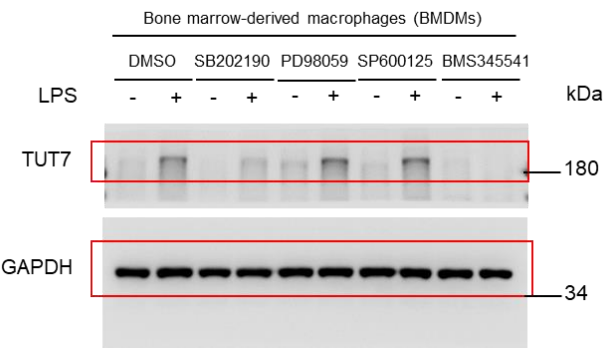

Supplementary figure 1b

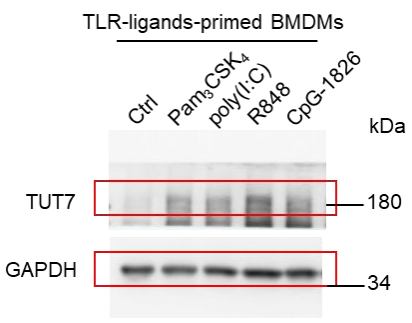

Supplementary figure 1c

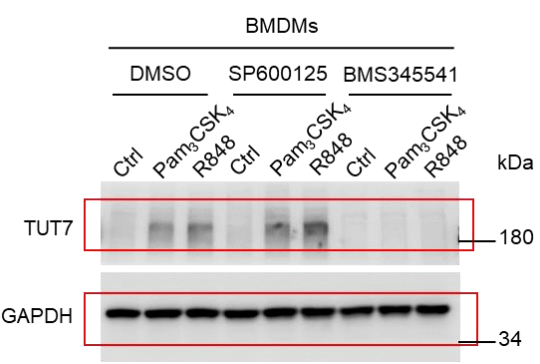

Supplementary figure 1d

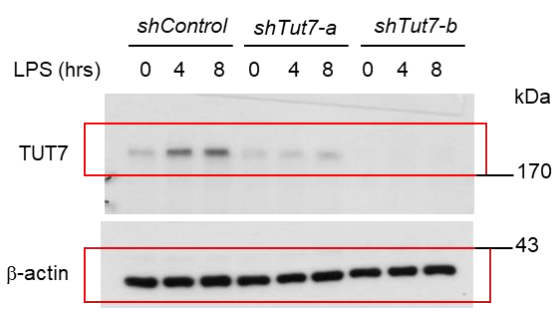

Supplementary figure 1g

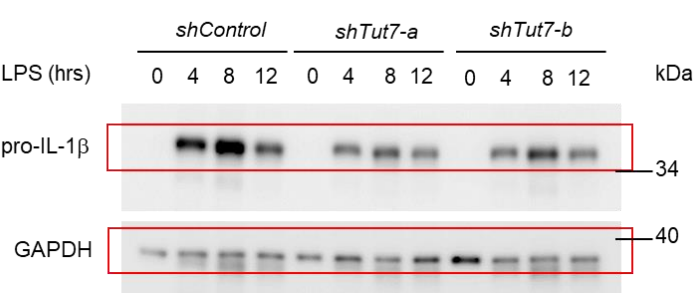

Supplementary figure 1i

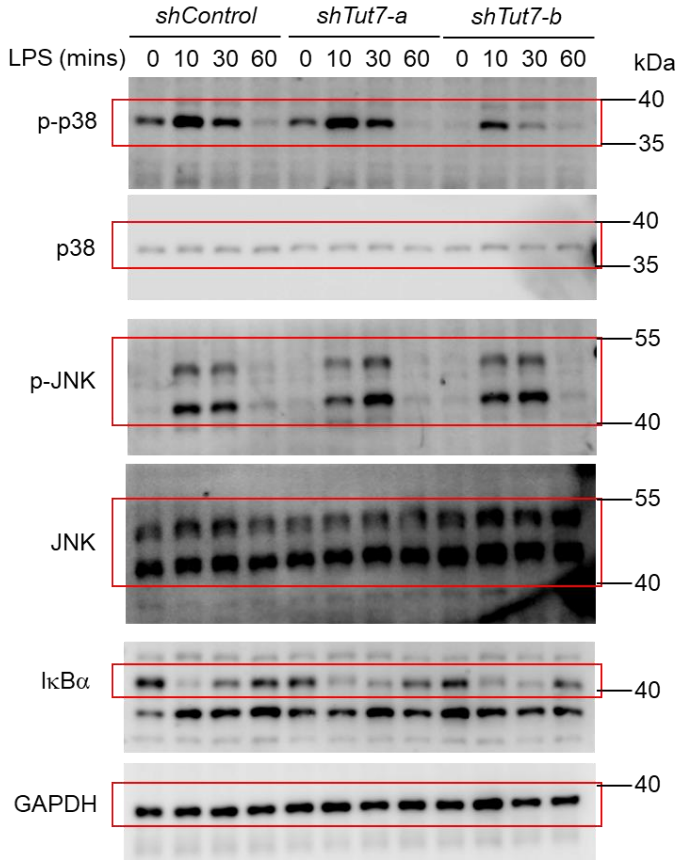

Supplementary figure 1j

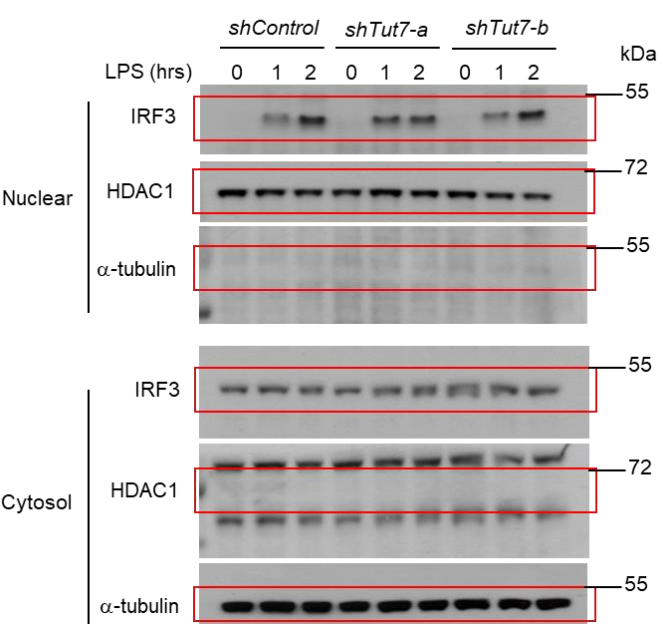

Supplement: 41467_2021_24177_MOESM1_ESM.pdf [file 41467_2021_24177_MOESM1_ESM.pdf]
